1 ***Drosophila* Males Use 5'-to-3' Phased Biogenesis to Make *Stellate*-silencing piRNAs**  
2 **that Lack Homology to Maternally Deposited piRNA Guides**

3 Zsolt G. Venkei<sup>1,\*</sup>, Ildar Gainetdinov<sup>2,\*</sup>, Margaret R. Starostik<sup>3</sup>, Charlotte P. Choi<sup>3</sup>, Peiwei  
4 Chen<sup>4</sup>, Chiraag Balsara<sup>5</sup>, Troy W. Whitfield<sup>1</sup>, George W. Bell<sup>1</sup>, Suhua Feng<sup>6,7</sup>, Steven E.  
5 Jacobsen<sup>6,7,8</sup>, Alexei A. Aravin<sup>4</sup>, John K. Kim<sup>3</sup>, Philip D. Zamore<sup>2,9,\*\*</sup>, and Yukiko M.  
6 Yamashita<sup>1,10,\*\*</sup>

7  
8 <sup>1</sup>Whitehead Institute for Biomedical Research, Department of Biology, Massachusetts  
9 Institute of Technology, Cambridge, MA, U.S.A.

10  
11 <sup>2</sup>RNA Therapeutics Institute, University of Massachusetts Medical School, Worcester, MA,  
12 U.S.A.

13  
14 <sup>3</sup>Department of Biology, Johns Hopkins University, Baltimore, MD, U.S.A.

15  
16 <sup>4</sup>Division of Biology and Biological Engineering, California Institute of Technology, Pasadena,  
17 CA, U.S.A.

18  
19 <sup>5</sup>University of Michigan, Life Sciences Institute, MI, U.S.A.

20  
21 <sup>6</sup>Department of Molecular, Cell and Developmental Biology, University of California, Los  
22 Angeles, PO Box 957239, Los Angeles, CA 90095-7239, USA

23  
24 <sup>7</sup>Eli and Edyth Broad Center of Regenerative Medicine and Stem Cell Research, University  
25 of California, Los Angeles, Los Angeles, CA 90095, USA

26  
27 <sup>8</sup>Howard Hughes Medical Institute, Los Angeles, CA 90095, USA

28  
29 <sup>9</sup>Howard Hughes Medical Institute, University of Massachusetts Chan Medical School,  
30 Worcester, MA, U.S.A.

31  
32 <sup>10</sup>Howard Hughes Medical Institute, Whitehead Institute, Cambridge, MA, U.S.A.

33 \*These authors equally contributed to this work

34 \*\*Corresponding authors: [yukikomy@wi.mit.edu](mailto:yukikomy@wi.mit.edu), [phillip.zamore@umassmed.edu](mailto:phillip.zamore@umassmed.edu)

35

36 **Abstract (148 words)**

37 PIWI-interacting RNAs (piRNAs) direct PIWI proteins to silence complementary targets  
38 such as transposons. In animals with a maternally specified germline, e.g. *Drosophila*  
39 *melanogaster*, maternally deposited piRNAs initiate piRNA biogenesis in the progeny.  
40 Normal fertility in *D. melanogaster* males requires repression of tandemly repeated *Stellate*  
41 genes by piRNAs from *Suppressor of Stellate* [*Su(Ste)*]. Because the *Su(Ste)* loci are on the Y  
42 chromosome, *Su(Ste)* piRNAs are not deposited in oocytes. How the male germline  
43 produces *Su(Ste)* piRNAs in the absence of maternally deposited *Su(Ste)* piRNAs is  
44 unknown. Here, we show that *Su(Ste)* piRNAs are made in the early male germline via 5'-to-  
45 3' phased piRNA biogenesis triggered by maternally deposited *1360/Hoppel* transposon  
46 piRNAs. Strikingly, deposition of *Su(Ste)* piRNAs from XXY mothers obviates the need for  
47 phased piRNA biogenesis in sons. Together, our study uncovers the developmentally  
48 programmed mechanism that allows fly mothers to protect their sons using a Y-linked  
49 piRNA locus.

50

## 51 **Introduction**

52 The PIWI-interacting RNA (piRNA) pathway is an animal-specific, small RNA-mediated  
53 mechanism that silences transposable elements and other selfish genetic elements (Ozata  
54 et al. 2019). Loss of piRNAs reduces fertility due to derepression of TEs (Girard et al. 2006;  
55 Aravin et al. 2007; Brennecke et al. 2007; Das et al. 2008), or deregulation of gene  
56 expression (Wu et al. 2020; Chen et al. 2021a; Choi et al. 2021). At the core of piRNA-  
57 mediated target silencing are 18–35-nt piRNAs that bind to and guide PIWI proteins to  
58 their targets via nucleotide sequence complementarity (Aravin et al. 2006; Girard et al.  
59 2006; Grivna et al. 2006; Lau et al. 2006; Vagin et al. 2006). The three *Drosophila*  
60 *melanogaster* PIWI proteins have specialized functions in the germline: Piwi represses  
61 transposon transcription in the nucleus, whereas cytoplasmic Ago3 and Aubergine (Aub)  
62 cleave piRNA precursor and transposon transcripts in the cytoplasm (Pal-Bhadra et al.  
63 2004; Saito et al. 2006; Vagin et al. 2006; Brennecke et al. 2007; Sienski et al. 2012; Huang  
64 et al. 2014; Le Thomas et al. 2014; Post et al. 2014; Han et al. 2015; Mohn et al. 2015; Senti  
65 et al. 2015; Wang et al. 2015).

66 To make new piRNAs, animals use pre-existing piRNAs to direct slicing of  
67 complementary transcripts, initiating piRNA biogenesis from cleavage products  
68 (Gainetdinov et al. 2018). For example, in the *D. melanogaster* female germline, Ago3 and  
69 Aub are loaded with piRNAs derived from complementary transcripts (transposon mRNAs  
70 and piRNA precursors), and the 3' cleavage product of Ago3 slicing is used to make  
71 antisense Aub-loaded piRNAs and vice versa. This positive feedback loop known as the  
72 'ping-pong' cycle amplifies the transposon-targeting population of piRNAs (Brennecke et al.  
73 2007; Gunawardane et al. 2007). The ping-pong pathway also initiates 5'-to-3'  
74 fragmentation of the remainder of the cleavage product into tail-to-head, phased piRNAs  
75 loaded in Piwi (Han et al. 2015; Homolka et al. 2015; Mohn et al. 2015; Yang et al. 2016).  
76 This process is carried out by the endonuclease Zucchini (Zuc; PLD6 in mammals) with the

77 help of the RNA helicase Armitage (Armi; MOV10L1 in mammals) (Pane et al. 2007; Ge et  
78 al. 2019; Munafo et al. 2019; Yamashiro et al. 2020).

79 The ping-pong cycle requires pre-existing piRNAs to initiate the amplification  
80 process. In *D. melanogaster*, maternally deposited piRNAs serve this purpose, providing the  
81 first pool of piRNAs that can initiate the ping-pong cycle (Blumenstiel and Hartl 2005;  
82 Brennecke et al. 2008; de Vanssay et al. 2012; Le Thomas et al. 2014; de Albuquerque et al.  
83 2015). For example, the inability of mothers to provide P-element-derived piRNAs in a  
84 cross between naïve mothers and P-element-infested fathers causes derepression of selfish  
85 elements, leading to sterile offspring, a phenomenon called hybrid dysgenesis (Kidwell et  
86 al. 1973; Kidwell and Kidwell 1976; Kidwell et al. 1977; Ronsseray et al. 1984; Brennecke  
87 et al. 2008; Khurana et al. 2011; Teixeira et al. 2017; Wakisaka et al. 2017; Moon et al.  
88 2018; Srivastav et al. 2019).

89 *Stellate (Ste)* and *Suppressor of Stellate [Su(Ste)]* in *D. melanogaster* provided the  
90 founding paradigm of piRNA-directed repression in *D. melanogaster* (Hardy et al. 1984;  
91 Livak 1984; McKee and Satter 1996; Kalmykova et al. 1998; Belloni et al. 2002). *Ste* is a  
92 repetitive gene whose unchecked expression results in the formation of Ste protein  
93 crystals, an amyloid-like protein aggregate that causes male sterility via unknown  
94 mechanisms (Bozzetti et al. 1995). To ensure male fertility, *Ste* genes on the X chromosome  
95 are normally repressed by *Su(Ste)* piRNAs that are antisense to *Ste* and are produced from  
96 the Y chromosome (Aravin et al. 2001; Aravin et al. 2003; Aravin et al. 2004; Vagin et al.  
97 2006). *Su(Ste)* locus is composed of tandem repeats that have high level (~90%) of identity  
98 to *Ste* sequence. *Ste* is the major silencing target of the piRNA pathway in the *D.*  
99 *melanogaster* male germline (Aravin et al. 2001; Aravin et al. 2003; Nishida et al. 2007;  
100 Nagao et al. 2010; Quenerch'du et al. 2016; Chen et al. 2021a), requiring *armi*, *zuc*, *aub* and  
101 *ago3*, but not *piwi* or *rhino (rhi)*, suggesting that *Ste* repression is primarily dependent on  
102 cytoplasmic cleavage of the *Ste* mRNA (Vagin et al. 2006; Pane et al. 2007; Klattenhoff et al.  
103 2009; Chen et al. 2021b). Because *Su(Ste)* is encoded on the Y chromosome, fly mothers—

104 which lack a Y chromosome—cannot provide their sons with *Su(Ste)* piRNAs to initiate  
105 biogenesis. How then is *Ste* repressed in the apparent absence of maternally deposited  
106 piRNAs?

107         Here, we describe the mechanism by which the male germline represses *Ste* in the  
108 absence of maternally deposited *Su(Ste)* piRNAs. We show that *Su(Ste)* piRNAs are  
109 produced by an *Armi*- and *Zuc*-dependent phased piRNA biogenesis in male germline stem  
110 cells (GSCs) and early spermatogonia (SGs), days before expression of the *Ste* target in the  
111 spermatocytes. Phased biogenesis of *Su(Ste)* piRNAs in GSCs/SGs is critical to repress *Ste*  
112 later in spermatocytes, and thus for male fertility. XX mothers cannot deposit Y-linked  
113 *Su(Ste)* piRNAs to their sons. Instead, our data show that males from XX mothers utilize  
114 maternally deposited *1360/Hoppel* piRNAs to cleave *Su(Ste)* precursors and initiate 5'-to-3'  
115 phased biogenesis of *Su(Ste)* piRNAs in the early germline (GSCs/SGs). We show that the  
116 requirement for *Armi*, a protein essential for phased piRNA biogenesis, in *Su(Ste)* piRNA  
117 production in males is relieved when XXY females provide maternal *Su(Ste)* piRNAs to their  
118 sons' germline. These data explain how maternally deposited piRNAs can direct production  
119 of non-homologous piRNA guides in the germline of the progeny. Our study reveals a  
120 mechanism for intergenerational transmission of piRNA-coded memory in the absence of  
121 direct homology that can protect offspring from selfish genetic elements not encountered  
122 by their mothers.

## 123 **Results**

### 124 **Transcription of *Su(Ste)* piRNA Precursors Starts in Germline Stem Cells, Days Before** 125 ***Ste* Expression**

126 To investigate *Su(Ste)* piRNA precursor expression and processing into piRNAs during *D.*  
127 *melanogaster* spermatogenesis, we used single-molecule RNA fluorescent *in situ*  
128 hybridization (smRNA-FISH) (Raj and Tyagi 2010; Fingerhut et al. 2019). By leveraging  
129 single nucleotide polymorphisms between *Ste* and *Su(Ste)*, we used a single *in situ* probe

130 and a collection of *Stellaris in situ* probes to specifically visualize *Su(Ste)* and *Ste*,  
131 respectively (see Methods). We detected expression of *Su(Ste)* piRNA precursor transcripts  
132 only from the genomic strand that produces transcripts antisense to *Ste* mRNAs (not  
133 shown). smRNA-FISH can detect *Ste* mRNAs and *Su(Ste)* precursor transcripts but not  
134 mature piRNAs, because small RNAs are not retained in formaldehyde-fixed tissues.

135 smFISH revealed that in wild-type testes, *Ste* transcripts are first detected in the  
136 nuclei of spermatocytes (Figure 1A, B, F). In contrast, in the absence of *Su(Ste)* in XO males,  
137 *Ste* transcripts were readily detected in the spermatocyte cytoplasm (Figure 1C, G), leading  
138 to production of *Ste* protein crystals, a known cause of subfertility. Notably, in XO males,  
139 cytoplasmic *Ste* mRNA was only observed in spermatocytes (Figure 1C), suggesting that *Ste*  
140 is transcriptionally silent in early germ cells (i.e. GSCs and SGs) (Figure 1C, E). Our smRNA-  
141 FISH experiments readily detected *Su(Ste)* expression in GSCs, earlier than previously  
142 reported (Aravin et al. 2004). Thus, *Su(Ste)* expression precedes that of *Ste* by ~2–3 days.  
143 The steady-state abundance of nuclear *Su(Ste)* transcripts peaked in late SGs/early  
144 spermatocytes and was undetectable by the time *Ste* expression was first detected, in late  
145 spermatocytes (Figure 1B, D, F).

146 Ping-pong amplification of *Ste*-targeting piRNAs should require the presence of both  
147 *Su(Ste)* and *Ste* RNA in the same cells. Our data suggest that ping-pong amplification is  
148 unlikely to explain the biogenesis of *Su(Ste)* piRNAs, because *Su(Ste)* piRNA precursors are  
149 transcribed and processed into *Ste*-targeting piRNAs before the first detectable  
150 accumulation of *Ste* mRNA.

151

### 152 ***zuc*- and *armi*-Dependent Processing of *Su(Ste)* piRNA Precursor Transcripts in** 153 **Germline Stem Cells and Spermatogonia**

154 We find that processing of *Su(Ste)* precursors into mature piRNAs in GSCs/SGs depends on  
155 components of the phased piRNA biogenesis pathway. In wild type GSCs/SGs, *Su(Ste)*  
156 transcripts were detected as a single nuclear focus, corresponding to nascent transcripts

157 from the *Su(Ste)* loci (Figure 2A, F). In contrast, in *armi*<sup>1/72.1</sup> or *zuc*<sup>EY11457/-</sup> loss-of-function  
158 mutants, the nuclear foci of *Su(Ste)* transcripts were enlarged and multiple cytoplasmic foci  
159 appeared, likely representing accumulation of unprocessed piRNA precursor transcripts  
160 (Figure 2C, E, H, K). Similar *Su(Ste)* cytoplasmic foci were detected when *armi* or *zuc* mRNA  
161 was specifically depleted in germ cells by RNAi using pVALIUM22 transgenes  
162 (*armi*<sup>TRIP.GL00254</sup> and *zuc*<sup>TRIP.GL00111</sup>; henceforth, *armi*<sup>RNAi</sup> and *zuc*<sup>RNAi</sup>) driven by *nanos(nos)-*  
163 *Gal4* (Van Doren et al. 1998) (Figure 1A). The appearance of *Su(Ste)* cytoplasmic foci in *zuc*  
164 and *armi* mutants (Figure 2K) is consistent with the increase in the steady-state abundance  
165 of *Su(Ste)* transcripts measured by RT-qPCR in *zuc*<sup>EY11457/-</sup> mutant testis enriched for SGs  
166 by over-expressing *dpp* (Figure S1).

167 By contrast, *Su(Ste)* piRNA precursor transcripts did not accumulate when *aub*,  
168 *ago3*, or *vas* mRNAs were depleted by *nos*-driven RNAi (Figure S2). Because Aub, Ago3, and  
169 Vasa are required for ping-pong amplification of piRNAs, these results suggest that in  
170 GSC/SGs the production of piRNAs from *Su(Ste)* transcripts is dominated by the phased  
171 piRNA biogenesis pathway.

## 172 ***Ste* Silencing Requires *zuc* and *armi* in Early Male Germ Cells**

173 Repression of *Ste* in late spermatocytes depends on *zuc* and *armi* expression during a short  
174 window in early spermatogenesis. When *armi* or *zuc* mRNA was depleted by *nos*-driven  
175 RNAi (*nos>armi*<sup>RNAi</sup> or *nos>zuc*<sup>RNAi</sup>) throughout the germline (Figure 1A), we observed  
176 derepression of *Ste* RNA (Figure 3A-C, G), accompanied by Ste protein accumulation  
177 (Figure 3I) and reduced fertility (Figure 3J). In contrast, using *bam-gal4* (Figure 1A) to  
178 deplete *armi* or *zuc* in >4-cell SG stages (*bam>armi*<sup>RNAi</sup> or *bam>zuc*<sup>RNAi</sup>) had no observable  
179 effect on *Ste* repression or fertility (Figure 3D, H, I, J), suggesting that *armi* and *zuc* are  
180 dispensable for *Ste* repression after the four-cell SG stage.

181 Consistent with the idea that *Ste* silencing requires Armitage in early germ cells,  
182 expression in *armi*<sup>1/72.1</sup> of an *armi-gfp* transgene under the control of *nos-gal4* restored *Ste*



183 repression (**Figure 3E, I, J**). In contrast, expression of the same rescue construct but driven  
184 by *bam-gal4* failed to rescue the *armi* mutant phenotype (**Figure 3F, I, J**). Conversely, both  
185 *nos-gal4*- and *bam-gal4*-driven RNAi of *aub*, *ago3*, or *vas* led to derepression of *Ste* in  
186 spermatocytes (**Figure 4A-E, H, I**). Yet expressing a *gfp-aub* rescue transgene using *bam-*  
187 *gal4* driver essentially restored *Ste* repression in the loss-of-function *aub* mutant  
188 (*aub<sup>HN2/QC42</sup>*) (**Figure 4F, G**), demonstrating that zygotic expression of ping-pong pathway  
189 genes after the 4-cell SG stage is required to repress *Ste*.

190 We conclude that *Su(Ste)* piRNA biogenesis and piRNA-directed silencing of *Ste* are  
191 temporally separated during fly spermatogenesis: *Su(Ste)* piRNAs are produced in a *zuc-*  
192 and *armi*-dependent manner in early germ cells (GSC to four-cell SG) and repress *Ste* later  
193 in spermatocytes via Aub- and Ago3-catalyzed cleavage.

#### 194 ***1360/Hoppel* piRNAs Trigger Phased Biogenesis of *Su(Ste)* piRNAs**

195 Efficient repression of *Ste* requires production of *Su(Ste)* piRNAs days before *Ste* is first  
196 expressed (**Figure 1, 4J**). Production of *Su(Ste)* piRNAs in early male germ cells requires Zuc  
197 and Armi, components of the phased piRNA biogenesis pathway (**Figure 2, 3, 4J**). Typically,  
198 phased piRNA biogenesis is initiated by a piRNA-directed slicing event that generates a  
199 long 5' monophosphorylated cleavage product (pre-pre-piRNA). The pre-pre-piRNA is then  
200 fragmented by Zuc into phased, tail-to-head piRNAs (Wang et al. 2014; Han et al. 2015;  
201 Homolka et al. 2015; Mohn et al. 2015). But *Ste* piRNAs that could trigger phased  
202 fragmentation of *Su(Ste)* precursors are not produced by mothers (see below).

203 We propose that phased production of *Su(Ste)* piRNAs is initiated by maternally  
204 inherited *1360/Hoppel* transposon-derived piRNAs that direct cleavage of the *1360/Hoppel*  
205 sequence residing at the 5' end of *Su(Ste)* precursors (**Figure 5A**). Several observations  
206 support this idea: (1) transcription of *Su(Ste)* starts inside a *1360/Hoppel* transposon  
207 insertion upstream of the sequence complementary to *Ste* (Aravin et al. 2001); (2) ovaries  
208 contain abundant *1360/Hoppel* transposon-derived piRNAs ( $\sim 18,200 \pm 400$  per 10 pg of



209 total RNA); and (3) mothers deliver *1360/Hoppel* piRNA to their male offspring via the  
210 oocyte (Brennecke et al. 2008).

211 To test this model, we sequenced  $\geq 200$ -nt long, 5' monophosphorylated RNAs from  
212 adult testis to identify putative *Su(Ste)* pre-pre-piRNAs whose 5' ends lie in the upstream  
213 *1360/Hoppel* insertion and are explained by piRNA-directed cleavage. Like all Argonautes,  
214 PIWI proteins cleave their targets between nucleotides t10 and t11, the target nucleotides  
215 complementary to piRNA nucleotides g10 and g11. For *Su(Ste)*-derived long RNAs  
216 overlapping both the upstream transposon insertion and the sequence complementary to  
217 *Ste*, the 5' ends of  $\sim 40\%$  of these long RNAs lay between nucleotides g10 and g11 of an  
218 antisense maternal *1360/Hoppel* piRNA. Supporting the idea that these long RNAs are pre-  
219 pre-piRNAs processed by phased biogenesis pathway, their steady-state abundance was  
220  $\sim$ five-fold higher when phased biogenesis in males was blocked using *nos*-driven *armi<sup>RNAi</sup>*  
221 (Figure 5B). Together, these data suggest that *Su(Ste)* precursor transcripts in early male  
222 germ cells are sliced by maternally deposited transposon-derived piRNAs.

### 223 ***Su(Ste)* piRNAs Made in XXY Females Silence *Ste* in the Germline of Progeny**

224 Our model assumes that piRNA•PIWI complexes deposited by mothers can cleave  
225 complementary RNAs in the germline of their sons. To experimentally test this assumption,  
226 we used XXY female flies to artificially produce *Su(Ste)* piRNAs in oocytes. Y chromosome-  
227 encoded *Su(Ste)* piRNA precursors and *Su(Ste)* piRNAs were detected in XXY ( $2,700 \pm 80$   
228 piRNAs per 10 pg total RNA) but not XX ovaries ( $30 \pm 30$  piRNAs per 10 pg total RNA;  
229 Figure 6A and S3). These maternally produced *Su(Ste)* piRNAs were able to repress a *gfp-*  
230 *Ste* transgene in XXY females (Figure S4). Strikingly, when *Su(Ste)* piRNA biogenesis was  
231 blocked in sons, maternal *Su(Ste)* piRNAs from XXY oocytes sufficed to silence *Stellate* in  
232 the testis: unlike *nos>armi<sup>RNAi</sup>* males from XX mothers (Figure 3I), *nos>armi<sup>RNAi</sup>* sons  
233 derived from XXY females effectively repressed *Ste* (Figure 6B-I and S5). We conclude that

234 maternal deposition of *Su(Ste)* piRNAs by XXY mothers suffices to silence *Ste* mRNA and  
235 bypasses the requirement for phased piRNA production pathway in early male germ cells.

236 High-throughput sequencing of long or small RNA from GSCs/early SGs is infeasible,  
237 because early germ cells constitute a small fraction of the adult testis. Artificial expression  
238 of *Su(Ste)* precursors in XXY ovaries however allowed us to test whether the production of  
239 phased *Su(Ste)* piRNAs in XXY females is initiated by *1360/Hoppel* transposon piRNAs that  
240 direct cleavage of *Su(Ste)* transcripts. Among  $\geq 200$ -nt long, 5' monophosphorylated RNAs  
241 from XXY ovaries, we identified putative *Su(Ste)* pre-pre-piRNAs that could have been  
242 produced by *1360/Hoppel* piRNA-guided slicing (Figure 7A, top). When we confined our  
243 analysis to *Su(Ste)* long RNAs spanning both the *1360/Hoppel* and *Ste*-derived sequences,  
244 we found that the 5' ends of  $\sim 35\%$  of such long RNAs overlapped an antisense  
245 *1360/Hoppel* piRNA by exactly 10 nt, suggesting that these monophosphorylated RNAs are  
246 pre-pre-piRNAs generated by transposon piRNA-directed slicing.

247 Consistent with Zuc-catalyzed fragmentation of pre-pre-piRNAs into tail-to-head  
248 piRNAs, XXY ovaries contained strings of *Su(Ste)* piRNAs in which the 3' end of one piRNA  
249 immediately precedes the 5' end of another piRNA (Figure S6A;  $Z_0 = 5.6$ ,  $p = 2 \times 10^{-8}$ ). Such  
250 tail-to-head piRNAs result in the nearly equidistant occurrence of piRNA 5' ends along a  
251 pre-pre-piRNA. Indeed, the 5' ends of most *Su(Ste)* piRNAs in XXY ovaries concentrated in  
252 periodic peaks lying  $\sim 26$  nt apart starting from *Su(Ste)* pre-pre-piRNA 5' termini. For  
253 example, for *Su(Ste)*-derived long RNAs whose 5' ends were in the last 100 nt of the  
254 *1360/Hoppel* sequence, most *Su(Ste)* piRNA 5' ends occurred at  $\sim 25$ – $27$ -nt intervals  
255 extending as far as  $\geq 150$  nt into the region of the *Su(Ste)* transcript antisense to *Ste* (Figure  
256 7A, bottom). Thus, the *1360/Hoppel* piRNAs present in XXY ovaries can slice *Su(Ste)*  
257 precursors to initiate 5'-to-3' phased production of *Su(Ste)* piRNAs capable of silencing *Ste*.  
258 We note that, because *Ste* loci are co-expressed with *Su(Ste)* in ovaries (Figure S6B), XXY  
259 ovaries produce *Ste* piRNAs via ping-pong with abundant *Su(Ste)* piRNAs (Figure S6C,

260  $Z_{10} = 33.7$ ). Importantly, we did not detect *Ste* piRNAs in XX ovaries, which lack *Su(Ste)*  
261 transcripts (Figure 6A).

## 262 **Discussion**

263 The piRNA pathway is required for production of functional germ cells in animals. In  
264 species like *Drosophila*, whose germline is specified by maternally inherited determinants,  
265 the oocyte germ plasm contains piRNA•PIWI complexes that instruct their progeny to  
266 silence transposons antisense to the inherited piRNAs. Intergenerational continuity of the  
267 piRNA pathway in these species therefore relies on the continued passage of information  
268 through the germline. Such maternal inheritance is not possible for Y chromosome-  
269 encoded piRNAs, as females lack a Y chromosome. How can mothers instruct their sons to  
270 make piRNAs from precursors on the Y chromosome? Our data suggest that the *D.*  
271 *melanogaster* male germline relies on maternally deposited, transposon-derived piRNAs to  
272 trigger production of *Su(Ste)* piRNAs antisense to *Ste*. The production of such *Ste*-silencing  
273 piRNAs is possible because piRNA-directed cleavage of an RNA triggers the production of  
274 tail-to-head strings of piRNA via the phased piRNA biogenesis pathway. This model  
275 explains how fly males make piRNAs for which no homologous piRNA guides can be  
276 deposited by mothers. Our study also reveals that abundant *Su(Ste)* piRNAs are produced  
277 before the onset of transcription of their target, *Ste*. Such spatiotemporal separation may be  
278 required for effective repression of *Stellate* mRNAs.

279 In the fly germline, the proteins Rhino and Kipferl bind heterochromatic piRNA-  
280 producing loci and initiate transcription of precursor transcripts from both genomic  
281 strands (Klattenhoff et al. 2009; Pane et al. 2011; Mohn et al. 2014; Baumgartner et al.  
282 2022). Promoter-independent, RNA polymerase II transcription of these dual-strand piRNA  
283 clusters occurs throughout each locus, ignoring splice sites and polyadenylation sequences  
284 (Zhang et al. 2014; Chen et al. 2016; Hur et al. 2016; Andersen et al. 2017). This atypical  
285 transcription strategy maximizes production of transposon-targeting piRNAs. *Su(Ste)*

286 piRNA biogenesis in the male germline is unlikely to involve such non-canonical  
287 transcription of *Su(Ste)*. First, our smFISH experiments detected *Su(Ste)* transcripts from  
288 only one genomic strand. Second, loss of *rhi* in fly males has no effect on *Ste* silencing (Chen  
289 et al. 2021b).

290 Taken together, our data suggest that the fly male germline has evolved a strategy  
291 that uses maternally supplied, transposon-derived piRNAs to generate Y-chromosome  
292 derived, *Su(Ste)* piRNAs that silence the selfish genetic element *Ste*. This strategy allows fly  
293 females to instruct their sons to produce piRNAs from sequences absent from the maternal  
294 genome. We speculate that this same mechanism may be used by mothers to protect their  
295 sons from selfish DNA in other species.

## 296 **Acknowledgements**

297 We thank the Bloomington *Drosophila* Stock Center and the Developmental Studies  
298 Hybridoma Bank for reagents. We thank Zhao Zhang and Nelson Lau for their helpful  
299 discussions, and the Yamashita lab members for comments on the manuscript. The  
300 research was supported by the Howard Hughes Medical Institute (YMY, PDZ, SEJ), National  
301 Institute of Health (NIH R01 HD109667 to JKK, R35 GM136275 to PDZ, R01GM097363 to  
302 AAA and R35 GM130272 to SEJ), and the Whitehead Institute for Biomedical Research  
303 (YMY).

304

## 305 **Author contributions**

306 ZGV and YMY conceived the project. ZV, IG, CB and YMY conducted experiments. ZGV, IG,  
307 YMY, PDZ designed experiments and interpreted the results. ZGV, IG, MRS, CPC, JKK, TWW,  
308 and BWB conducted bioinformatics analysis. PC and AA contributed critical information in  
309 the course of the investigation. ZGV, IG, YMY, PDZ wrote and edited the manuscript with the  
310 inputs from other authors. YMY and PDZ supervised the research.

## 311 **Materials and Methods**

### 312 *Fly husbandry and strains used*

313 Flies were raised in standard Bloomington medium at 25°C. The following stocks were  
314 obtained from the Bloomington Stock Center: *C(1)RM/C(X:Y)y<sup>f</sup>w<sup>'</sup>*, *armi<sup>1</sup>*, *armi<sup>72.1</sup>*, *aub<sup>HN2</sup>*,  
315 *aub<sup>QC42</sup>*, *zuc<sup>EY11457</sup>*, *Df(2L)BSC323*, *nos-gal4:VP16*, *bam-gal4:VP16*, *UAS-gfp-aub*, *UAS-armi-*  
316 *gfp*, *UAS-dpp*. RNAi line for *armi*: TRIP.GL00254, *aub*: TRIP.GL00076, *ago3*:  
317 TRIP.HMC02938, *vasa*: TRIP.HMS00373, *zuc*: TRIP.GL00111. To generate *UAS-gfp-Ste*  
318 (*SteXh:CG42398*), cDNAs was synthesized (Invitrogen, sequence is provided in  
319 [Supplementary Table S1](#)), and inserted into *UAST-gfp* vector, after the *gfp* cDNA cassette,  
320 between BglII and XbaI sites. Transgenic lines carrying these transgenes were generated at  
321 BestGene.

322 To assay male fertility, a single male of indicated genotype (0-1days old) was  
323 crossed to three *y<sup>1w1118</sup>* virgin females (0-2 days old) at room temperature. Flies were  
324 removed after 7 days, and the number of progenies was scored.

### 325 *Western blots*

326 Testes (20 pairs/sample) were dissected and rinsed with PBS twice, snap frozen, and kept  
327 at -80°C until use. Testes were homogenized in 100µl PBS, supplied with complete protease  
328 inhibitor +EDTA (Roche), and mixed with 100µL of 2X Laemmli Sample Buffer (BioRad).  
329 Cleared lysates were separated on a 12% Tris-Glycine gel (Thermo Scientific), and  
330 transferred onto polyvinylidene fluoride (PVDF) membrane (Immobilon-P, Millipore). The  
331 primary antibodies used: mouse anti- $\alpha$ -Tubulin (4.3; 1:3000)(Walsh 1984) obtained from  
332 the Developmental Studies Hybridoma Bank), anti-Ste serum (1:10,000). The polyclonal  
333 anti-Ste antibody was generated by immunizing guinea pigs with KLH conjugated Ac-  
334 KPVIDSSSGLLYGDEKKWC (53-70aa of Ste, Covance, Princeton, NJ). Horseradish peroxidase  
335 (HRP)-conjugated goat anti-mouse IgG, and anti-guinea pig IgG (1:10,000; Jackson  
336 ImmunoResearch Laboratories) secondary antibodies were used. The signals were

337 detected by Pierce ECL Western Blotting Substrate enhanced chemiluminescence system  
338 (Thermo Scientific).

### 339 *smRNA-FISH*

340 smRNA-FISH was conducted following the protocol described previously (Fingerhut et al.  
341 2019). DNA oligo probes to detect *Ste* and *Su(Ste)* RNA were conjugated with Quasar 570,  
342 Cy3 or Cy5 fluorophores (Biosearch Technologies and IDT, see [Supplementary Table S2](#) for  
343 probe information). Testes were mounted using VECTASHIELD media with 4',6-diamidino-  
344 2-phenylindole (DAPI; Vector Labs). Images were captured by a Leica TCS SP8 confocal  
345 microscope with a 63×oil-immersion objective (NA = 1.4) and processed by ImageJ  
346 software.

### 347 *qRT-PCR*

348 Total RNA was isolated by Direct-zol RNA miniprep kit (Zymo Research) from biological  
349 triplicates of XY (100 testis/sample), XX or XXY gonads (60 ovary/sample). cDNA was  
350 generated by SuperScript III Reverse Transcriptase (Invitrogen) with random hexamer  
351 primers. qPCRs of technical triplicates were performed by using Power SYBR Green  
352 reagent (Applied Biosystems), and the following primer pairs. *Gapdh*: TAA ATT CGA CTC  
353 GAC TCA CGG T and CTC CAC CAC ATA CTC GGC TC, *act5C*: AAG TTG CTG CTC TGG TTG TCG  
354 and GCC ACA CGC AGC TCA TTG AG, *Su(Ste)*: TTC CGA AGT CAA GCG CTT CAA TG and GGA  
355 ATC TGT TTA ATT GCA ACA AC.

356 Ct values were normalized to *Gapdh* by the  $\Delta\Delta C_t$  method.

### 357 *TaqMan small RNA analysis*

358 The abundance of the following piRNAs were quantified by TaqMan small RNA custom  
359 assays (ThermoFisher Scientific): *Su(Ste)-4* piRNA (target sequence: UCU CAU CGU CGU  
360 AGA ACA AGC CCG A), the most abundant *Su(Ste)* piRNA (Nagao et al. 2010), *piR-dme-1643*  
361 *piRNA* (piRBase nomenclature), target sequence: (TAA AGC GTT GTT TTG TGC TAT ACC C),

362 a piRNA we found to be highly abundant in the ovary based on analysis of earlier small RNA  
363 sequencing data (Brennecke et al. 2008), and 2S rRNA (target sequence: UGC UUG GAC UAC  
364 AUA UGG UUG AGG GUU GUA), which small RNAs we utilized in this study as control. Total  
365 RNA was isolated from biological triplicates of XX and XXY ovaries (60/sample) by Direct-  
366 zol miniprep kit (Zymo Research). Reverse transcription and qPCR were performed  
367 following the manufacturer's protocol using TaqMan MicroRNA Reverse Transcription Kit,  
368 and TaqMan Universal PCR Master Mix II, No UNG (ThermoFisher Scientific). qPCRs were  
369 performed in technical triplicates with the appropriate controls. Ct values were normalized  
370 to 2S rRNA levels by the  $\Delta\Delta C_t$  method.

### 371 *Small RNA-seq Library Preparation and Analyses*

372 Total RNA from fly ovaries or testis was extracted using the mirVana miRNA isolation kit  
373 (Thermo Fisher, AM1560). Small RNA libraries were constructed as described (Gainetdinov  
374 et al. 2021) with modifications. Briefly, before library preparation, a spike-in RNA mix, an  
375 equimolar mix of six synthetic 5' phosphorylated RNA oligonucleotides (/phos/UGC UAG  
376 UCU UAU CGA CCU CCU CAU AG, /phos/UGC UAG UCU UCG AUA CCU CCU CAU AG,  
377 /phos/UGC UAG UCU UGU CAC GAA CCU CAU AG  
378 /phos/UGC UAG UUA UCG ACC UUC AUA G, /phos/UGC UAG UUC GAU ACC UUC AUA G,  
379 /phos/UGC UAG UUG UCA CGA AUC AUA G), was added to each RNA sample to enable  
380 absolute quantification of small RNAs ([Supplementary Table S3](#)). To reduce ligation bias  
381 and eliminate PCR duplicates, the 3' and 5' adaptors both contained nine random  
382 nucleotides at their 5' and 3' ends, respectively (see below) and 3' adaptor ligation  
383 reactions contained 25% (w/v) PEG-8000 (f.c.). Total RNA was run through a 15%  
384 denaturing urea-polyacrylamide gel (National Diagnostics) to isolate 15–29 nt small RNAs  
385 and remove the 30-nt 2S rRNA. After overnight elution in 0.4 M NaCl followed by ethanol  
386 precipitation, small RNAs were oxidized (to clone only 2'-O-methylated small RNAs) in 40  
387  $\mu$ l of 200 mM sodium periodate, 30 mM borax, 30 mM boric acid (pH 8.6) at 25°C for 30



388 min. After ethanol precipitation, small RNAs were ligated to 25 pmol of 3' DNA adapter  
389 with adenylated 5' and dideoxycytosine-blocked 3' end (/rApp/NNN GTC NNN TAG NNN  
390 TGG AAT TCT CGG GTG CCA AGG/ddC/) in 30 µl of 50 mM Tris-HCl (pH 7.5), 10 mM MgCl<sub>2</sub>,  
391 10 mM DTT, and 25% (w/v) PEG-8000 (NEB) with 600U of T4 Rnl2tr K227Q (homemade)  
392 at 16°C overnight. After ethanol precipitation, the 50–90 nt (14–54 nt small RNA + 36 nt 3'  
393 UMI adapter) 3' ligated product was purified from a 15% denaturing urea-polyacrylamide  
394 gel (National Diagnostics). After overnight elution in 0.4 M NaCl followed by ethanol  
395 precipitation, the 3' ligated product was denatured in 14 µl water at 90°C for 60 sec, 1 µl of  
396 50 µM RT primer (CCT TGG CAC CCG AGA ATT CCA) was added and annealed at 65°C for 5  
397 min to suppress the formation of 5'-adapter:3'-adapter dimers during the next step. The  
398 resulting mix was then ligated to a mixed pool of equimolar amount of two 5' RNA adapters  
399 (to increase nucleotide diversity at the 5' end of the sequencing read: GUU CAG AGU UCU  
400 ACA GUC CGA CGA UCN NNC GAN NNU CAN NN and GUU CAG AGU UCU ACA GUC CGA CGA  
401 UCN NNA UCN NNA GUN NN) in 20 µl of 50 mM Tris-HCl (pH 7.8), 10 mM MgCl<sub>2</sub>, 10 mM  
402 DTT, 1 mM ATP with 20U of T4 RNA ligase (Thermo Fisher, EL0021) at 25°C for 2 h. The  
403 ligated product was precipitated with ethanol, and cDNA synthesis was performed in 20 µl  
404 at 42°C for 1 hour using AMV reverse transcriptase (NEB, M0277) and 5 µl of the RT  
405 reaction was amplified in 25 µl using AccuPrime Pfx DNA polymerase (Thermo Fisher,  
406 12344024; 95°C for 2 min, 15 cycles of: 95°C for 15 sec, 65°C for 30 sec, 68°C for 15 sec;  
407 forward primer: AAT GAT ACG GCG ACC ACC GAG ATC TAC ACG TTC AGA GTT CTA CAG  
408 TCC GA; reverse primer: CAA GCA GAA GAC GGC ATA CGA GAT XXX XXX GTG ACT GGA GTT  
409 CCT TGG CAC CCG AGA ATT CCA, where XXXXXX represents 6-nt sequencing barcode).  
410 Finally, the PCR product was purified in a 2% agarose gel. Small RNA-seq libraries samples  
411 were sequenced using a NextSeq 550 (Illumina) to obtain 79-nt, single-end reads.

412 The 3' adapter (TGG AAT TCT CGG GTG CCA AGG) was removed with fastx toolkit  
413 (v0.0.14), PCR duplicates were eliminated as described (Fu et al. 2018), and rRNA matching  
414 reads were removed with bowtie (parameter -v 1; v1.0.0) against *D. melanogaster* set in

415 SILVA database (Glockner et al. 2017). Deduplicated and filtered data were analyzed with  
416 Tailor (Chou et al. 2015) to account for non-templated tailing of small RNAs. Sequences of  
417 synthetic RNA spike-in oligonucleotides were identified allowing no mismatches with using  
418 bowtie (parameter -v 0; v1.0.0), and the absolute abundance of small RNAs calculated. The  
419 background for  $Z_0$  and  $Z_{10}$  calculation was all displayed data except positions 0 and 10,  
420 respectively.

421

#### 422 *Cloning and Sequencing of 5' Monophosphorylated Long RNAs*

423 Total RNA from fly ovaries or testis was extracted using mirVana miRNA isolation kit  
424 (Thermo Fisher, AM1560) and used to prepare a library of 5' monophosphorylated long  
425 RNAs as described (Gainetdinov et al. 2021) with modifications. Briefly, to deplete rRNA,  
426 1  $\mu$ g total RNA was hybridized in 10  $\mu$ l to a pool of rRNA antisense oligos (0.05  $\mu$ M f.c. each)  
427 in 10 mM Tris-HCl (pH 7.4), 20 mM NaCl by heating the mixture to 95°C, cooling it at  
428 -0.1°C/sec to 22°C, and incubating at 22°C for 5 min. RNase H (10 U; Lucigen, H39500) was  
429 added and the mixture incubated at 45°C for 30 min in 20  $\mu$ l containing 50 mM Tris-HCl  
430 (pH 7.4), 100 mM NaCl, and 20 mM MgCl<sub>2</sub>. The reaction volume was adjusted to 50  $\mu$ l with  
431 1 $\times$  TURBO DNase buffer (Thermo Fisher, AM2238) and then incubated with 4 U TURBO  
432 DNase (Thermo Fisher, AM2238) for 20 min at 37°C. Next, RNA was purified using RNA  
433 Clean & Concentrator-5 (Zymo Research, R1016) to retain  $\geq$  200-nt fragments. RNA was  
434 then ligated to a mixed pool of equimolar amount of two 5' RNA adapters (to increase  
435 nucleotide diversity at the 5' end of the sequencing read: GUU CAG AGU UCU ACA GUC CGA  
436 CGA UCN NNC GAN NNU CAN NN and GUU CAG AGU UCU ACA GUC CGA CGA UCN NNA UCN  
437 NNA GUN NN) in 20  $\mu$ l of 50 mM Tris-HCl (pH 7.8), 10 mM MgCl<sub>2</sub>, 10 mM DTT, 1 mM ATP  
438 with 60U of High Concentration T4 RNA ligase (NEB, M0437M) at 16°C overnight. The  
439 ligated product was isolated using RNA Clean & Concentrator-5 (Zymo Research, R1016) to  
440 retain  $\geq$  200-nt RNAs and reverse transcribed in 25  $\mu$ l with 50 pmol RT primer (GCA CCC  
441 GAG AAT TCC ANN NNN NNN) using SuperScript III (Thermo Fisher, 18080093). After

442 purification with 50 µl Ampure XP beads (Beckman Coulter, A63880), cDNA was PCR  
443 amplified using NEBNext High-Fidelity (NEB, M0541; 98°C for 30 sec; 4 cycles of: 98°C for  
444 10 sec, 59°C for 30 sec, 72°C for 12sec; 6 cycles of: 98°C for 10 sec, 68°C for 10 sec, 72°C for  
445 12sec; 72°C for 3 min; with the following primers: CTA CAC GTT CAG AGT TCT ACA GTC  
446 CGA and GCC TTG GCA CCC GAG AAT TCC A). PCR products between 200–400 bp were  
447 isolated with a 1% agarose gel, purified with QIAquick Gel Extraction Kit (Qiagen, 28706),  
448 and amplified again with NEBNext High-Fidelity (NEB, M0541; 98°C for 30 sec; 3 cycles of:  
449 98°C for 10 sec, 68°C for 30 sec, 72°C for 14 sec; 6 cycles of: 98°C for 10 sec, 72°C for 14  
450 sec; 72°C for 3 min; forward primer: AAT GAT ACG GCG ACC ACC GAG ATC TAC ACG TTC  
451 AGA GTT CTA CAG TCC GA; reverse primer: CAA GCA GAA GAC GGC ATA CGA GAT XXX XXX  
452 GTG ACT GGA GTT CCT TGG CAC CCG AGA ATT CCA, where XXXXXX represents 6-nt  
453 sequencing barcode). The PCR product was purified in a 1 % agarose gel and sequenced  
454 using a NextSeq 550 and NovaSeq (Illumina) to obtain 79+79-nt, paired-end reads.

455 Sequencing data was aligned to fly genome (dm6) with piPipes (Han et al., 2015b).  
456 Briefly, before starting piPipes, sequences were reformatted to remove the degenerate  
457 portion of the 5' adapter (nucleotides 1–15 of read1). The reformatted reads were then  
458 aligned to fly rRNA using bowtie2 (v2.2.0). Unaligned reads were mapped to fly genome  
459 (dm6) using STAR (v2.3.1), alignments with soft clipping of ends were removed with  
460 SAMtools (v1.0.0), and reads with the same 5' end were merged to represent a single 5'  
461 monophosphorylated RNA species.

#### 463 **Data Availability**

464 Sequencing data are available from the National Center for Biotechnology Information  
465 Small Read Archive using accession number PRJNA879723.

466

467

468 **Main Figures**

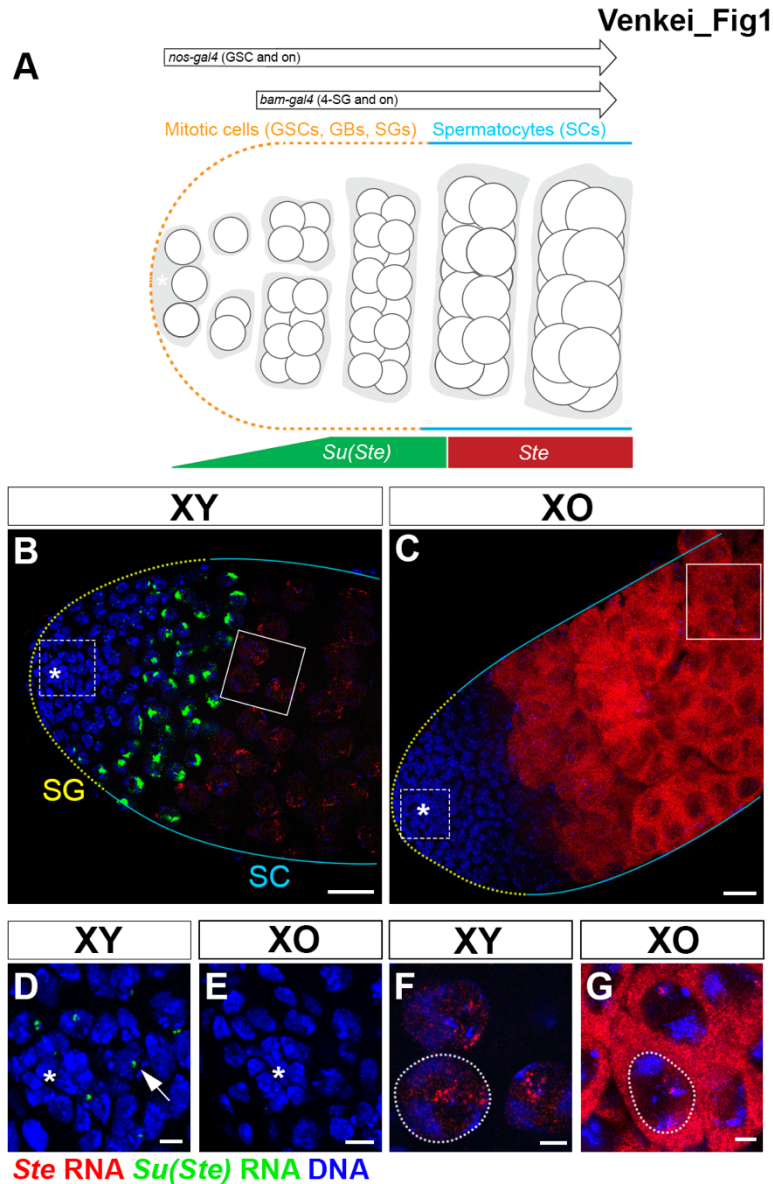

469 **Figure 1. *Su(Ste)* transcription precedes that of *Ste* during germ cell differentiation.**

470 (A) Early stages of *D. melanogaster* spermatogenesis. The stem cell niche is formed by non-  
 471 dividing somatic cells (hub, marked by asterisk). The germline stem cells (GSCs) are  
 472 physically attached to the hub, and divide asymmetrically. The gonialblasts (GBs), the  
 473 differentiating daughters of GSCs, undergo four rounds of mitotic divisions with incomplete  
 474 cytokinesis. Resultant 16-cell spermatogonia (SGs) then enter meiotic prophase as  
 475 spermatocytes. The expression patterns of *nos-gal4* and *bam-gal4* drivers in the adult male

476 germ line are also indicated. GSCs/early SGs are indicated by yellow dotted line, zone of  
477 spermatocytes by cyan lines in this and all subsequent figures. (B-C) Expression of *Ste* (red)  
478 and *Su(Ste)* (green) in the wild type (B) and in XO (C) testes. (D-E) Inserts from B and C  
479 magnifying the stem cell niche in wild type (D) and XO (E) testes. Arrow points to *Su(Ste)*  
480 transcripts in a GSC nucleus. (F-G) Magnified inserts from B and C show subcellular *Ste*  
481 localization in wild type (F) and XO (G) spermatocytes. Dotted white lines indicate the  
482 nuclear periphery. Hub (\*), *Ste* RNA (red), *Su(Ste)* RNA (green), DAPI (blue). Bars 20  $\mu\text{m}$  for  
483 B-C, and 5  $\mu\text{m}$  for D-G.  
484

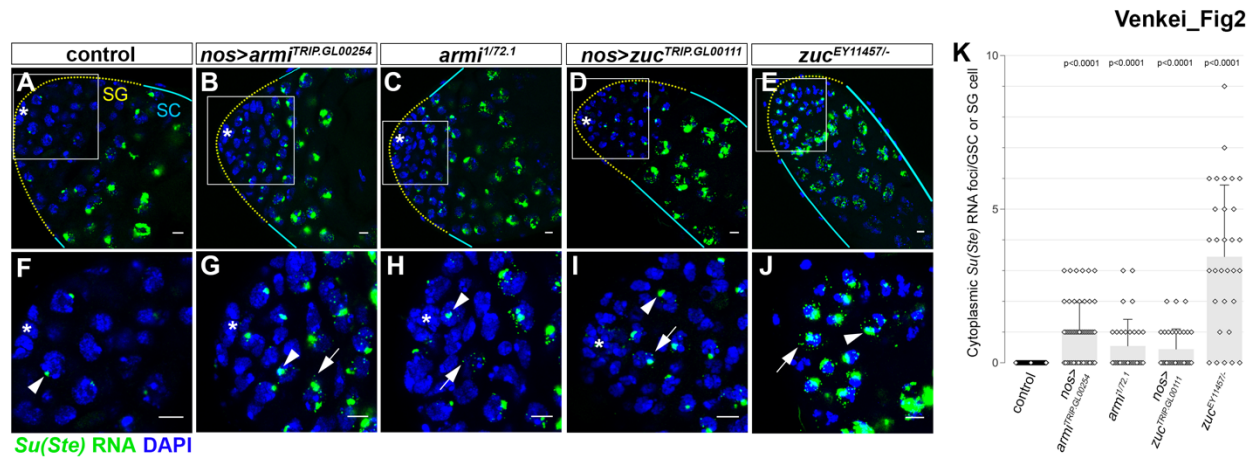

485

486 **Figure 2. *Su(Ste)* precursor transcripts are increased in GSCs and SGs of *armi* and *zuc***

487 **mutant testes. *Su(Ste)* transcript (green) in wild type testis (A, F), and in piRNA pathway**

488 **mutant testes of the indicated genotypes (B-E, G-J). (F-J) magnified regions of the niche**

489 **from A-E (marked by quadrates). Loss-of-function allelic combinations *armi<sup>1/72.1</sup>* and**

490 ***zuc<sup>EY11457/-</sup>* were used. RNAi constructs (*armi<sup>TRIP.GL00254</sup>*, *zuc<sup>TRIP.GL00111</sup>*) were expressed by**

491 ***nos-gal4*, which drives expression in early germ cells (GSCs and onward). GSC/early SGs are**

492 **indicated by yellow dotted line, zone of spermatocytes by cyan lines. Arrowheads point to**

493 **nuclear transcripts, arrows point to cytoplasmic RNA foci. Hub (\*), DAPI (blue), bars 5  $\mu$ m.**

494 **K) Quantification of cytoplasmic *Su(Ste)* RNA foci in GSCs and SG cells. Data are presented**

495 **as mean $\pm$ s.d.  $N=30-90$  nuclei/genotype. P-value from Welch's unequal variances t-test**

496 **(unpaired, two-tailed) is provided compared to control.**

497



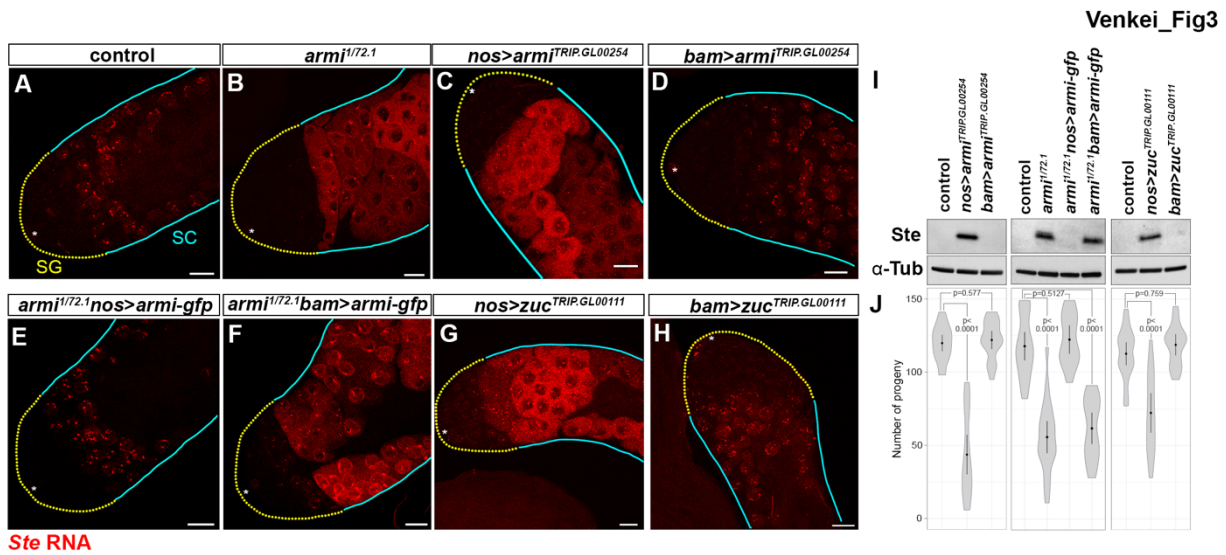

498

499 **Figure 3. *armi* and *zuc* are specifically required in GSCs/early SGs to repress *Ste*. *Ste***  
 500 **smRNA-FISH (red) in the testes from control (A), *armi*<sup>1/72.1</sup>, (B), *nos>armi*<sup>RNAi</sup>**  
 501 **(*armi*<sup>TRIP.GL00254</sup>)(C), *bam>armi*<sup>RNAi</sup> (D), *armi*<sup>1/72.1</sup> expressing *armi-gfp* with *nos-gal4* (E),**  
 502 ***armi*<sup>1/72.1</sup> expressing *armi-gfp* with *bam-gal4* (F), *nos>zuc*<sup>RNAi</sup> (*zuc*<sup>TRIP.GL00111</sup>)(G) or**  
 503 ***bam>zuc*<sup>RNAi</sup> (H). GSCs/early SGs are indicated by yellow dotted line, zone of spermatocytes**  
 504 **by cyan lines. Hub (\*), bars 20 μm. (I) Anti-Stellate and anti-Tubulin western blots of whole**  
 505 **testis lysates from the indicated genotypes. (J) Male fertility of indicated genotypes**  
 506 **(number of progeny/male/7 days). Data are presented as mean±s.d. N=20 male per**  
 507 **genotype. P-value from Welch's unequal variances t-test (unpaired, two-tailed) is provided**  
 508 **compared to control.**

509



Venkei\_Fig4

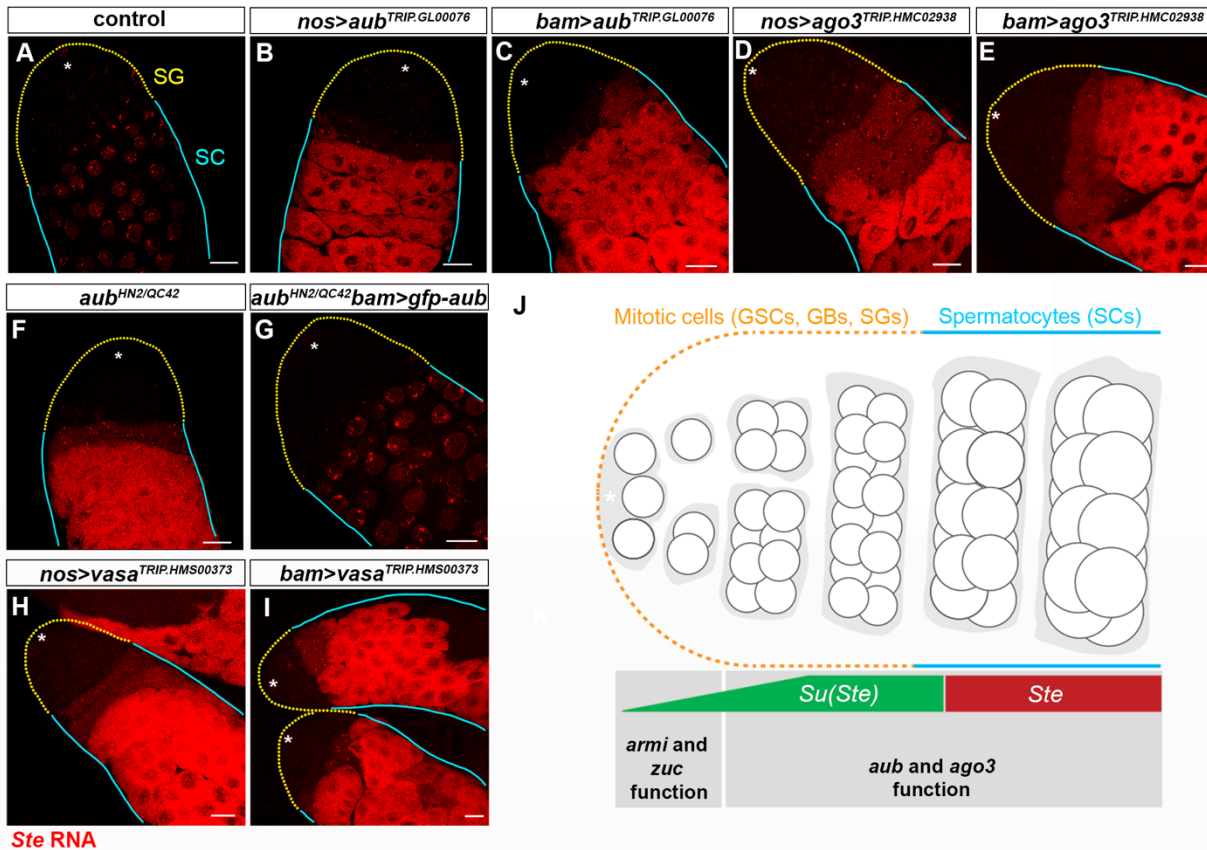

510

511 **Figure 4. Ping-pong pathway components, *aub*, *ago3* and *vasa*, are specifically**  
 512 **required in later SGs/spermatocytes to repress *Ste*.** (A-I) *Ste* smRNA-FISH (red) in the  
 513 testes from control (A), *nos>aub<sup>RNAi</sup>* (*aub<sup>TRIP.GL00076</sup>*), (B), *bam>aub<sup>RNAi</sup>* (C), *nos>ago3<sup>RNAi</sup>*  
 514 (*ago3<sup>TRIP.HMC02938</sup>*) (D), *bam>ago3<sup>RNAi</sup>* (E), *aub<sup>HN2/QC42</sup>* (F), *aub<sup>HN2/QC42</sup>* expressing *gfp-aub*  
 515 with *bam-gal4* (G), *nos>vasa<sup>RNAi</sup>* (*vas<sup>TRIP.HMS00373</sup>*) (H), *bam>vasa<sup>RNAi</sup>* (I) testes. GSCs/early SGs  
 516 are indicated by yellow dotted line, spermatocytes by cyan lines. Hub (\*), bars 20 μm. (J)  
 517 Summary of the developmental stages where *Su(Ste)* and *Ste* are expressed, and where  
 518 *armi/zuc*, and *aub/ago3* are required.

519

## Venkei\_Fig5

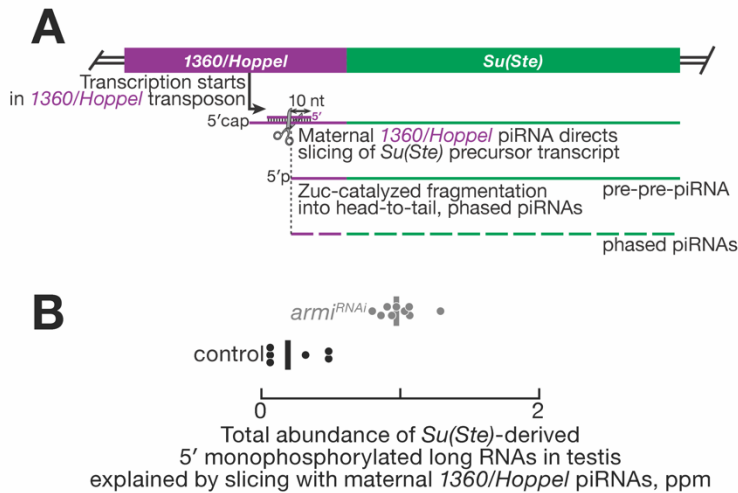

520

521 **Figure 5. Trigger piRNAs for phased *Su(Ste)* piRNA biogenesis in males.** (A) Model for

522 initiation of phased biogenesis of *Su(Ste)* piRNAs by maternal *1360/Hoppel* piRNAs. (B)

523 Putative pre-pre-piRNAs produced via cleavage guided by maternal *1360/Hoppel* piRNAs

524 in male gonads. Data are from all possible permutations of ovarian small RNA ( $n = 3$ ) and 5'

525 monophosphorylated long RNA data sets ( $n = 2$  for control;  $n = 3$  for *armi<sup>RNAi</sup>*).

526

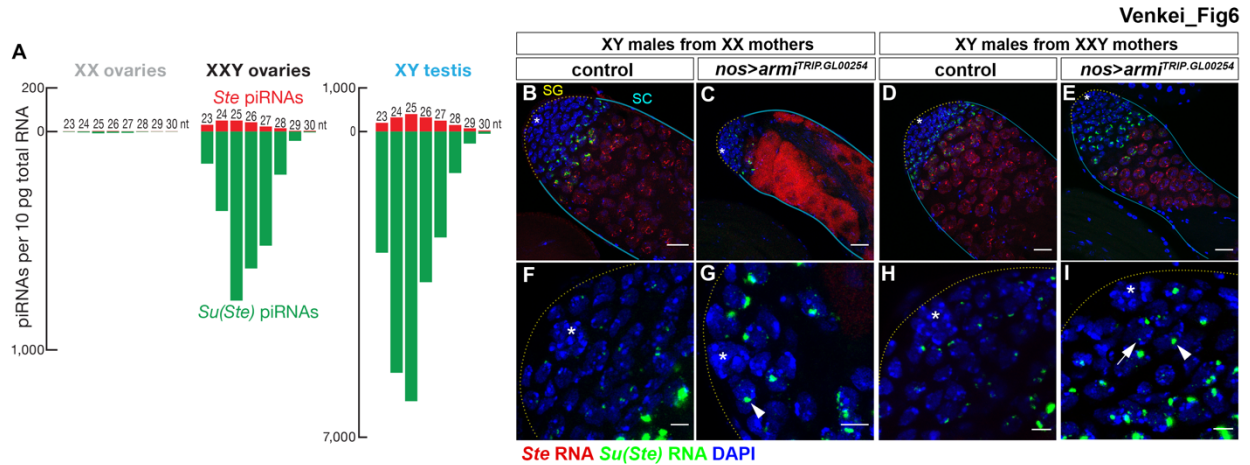

527

528 **Figure 6. Maternally deposited *Su(Ste)* piRNAs can rescue *Ste* repression in *armi<sup>RNAi</sup>***

529 **male germline.** (A) Length profile of *Ste*- and *Su(Ste)*-derived piRNAs in XX, XXY ovaries,

530 and XY testis. (B-E) Testes of control (B) and *nos>armi<sup>RNAi</sup>* (C) sons from XX mothers,

531 showing derepression of *Ste* in *nos>armi<sup>RNAi</sup>*, and testes of control (D) and *nos>armi<sup>RNAi</sup>* (E)

532 sons from XXY mothers, showing that *nos>armi<sup>RNAi</sup>* sons can repress *Ste*, if they are from

533 XXY mothers. *Ste* RNA (red), *Su(Ste)* piRNA precursor (green), DAPI (blue). (F-I) *Su(Ste)*

534 piRNA precursor in situ hybridization signals at the apical tip of the testis from the

535 indicated genotypes. Arrowheads point to enhanced nuclear transcripts, arrow points to a

536 cytoplasmic RNA, indicating incomplete piRNA processing in *nos>armi<sup>RNAi</sup>*. Bars 20  $\mu$ m for

537 B-E, and 5  $\mu$ m for F-I.

538

## Venkei\_Fig7

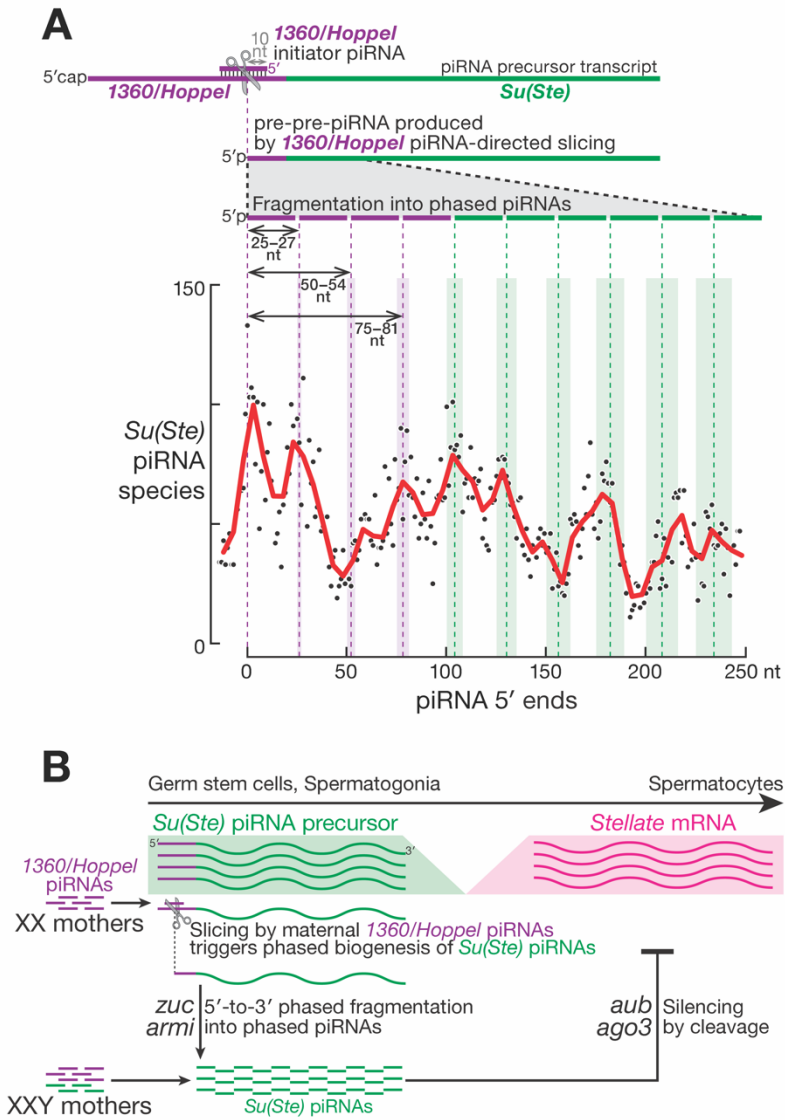

539

540 **Figure 7. Phased biogenesis of *Su(Ste)* piRNAs in XXY ovaries and in males.** (A) Phased

541 biogenesis of *Su(Ste)* piRNAs in XXY ovaries. (B) Model of developmental regulation of

542 *Su(Ste)* piRNA biogenesis and *Ste* repression in males.

543

## 544 **References**

- 545 Andersen PR, Tirian L, Vunjak M, Brennecke J. 2017. A heterochromatin-dependent  
546 transcription machinery drives piRNA expression. *Nature* **549**: 54-59.
- 547 Aravin A, Gaidatzis D, Pfeffer S, Lagos-Quintana M, Landgraf P, Iovino N, Morris P,  
548 Brownstein MJ, Kuramochi-Miyagawa S, Nakano T et al. 2006. A novel class of small  
549 RNAs bind to MILI protein in mouse testes. *Nature* **442**: 203-207.
- 550 Aravin AA, Hannon GJ, Brennecke J. 2007. The Piwi-piRNA pathway provides an adaptive  
551 defense in the transposon arms race. *Science* **318**: 761-764.
- 552 Aravin AA, Klenov MS, Vagin VV, Bantignies F, Cavalli G, Gvozdev VA. 2004. Dissection of a  
553 natural RNA silencing process in the *Drosophila melanogaster* germ line. *Molecular and*  
554 *cellular biology* **24**: 6742-6750.
- 555 Aravin AA, Lagos-Quintana M, Yalcin A, Zavolan M, Marks D, Snyder B, Gaasterland T,  
556 Meyer J, Tuschl T. 2003. The small RNA profile during *Drosophila melanogaster*  
557 development. *Dev Cell* **5**: 337-350.
- 558 Aravin AA, Naumova NM, Tulin AV, Vagin VV, Rozovsky YM, Gvozdev VA. 2001. Double-  
559 stranded RNA-mediated silencing of genomic tandem repeats and transposable elements  
560 in the *D. melanogaster* germline. *Current biology : CB* **11**: 1017-1027.
- 561 Baumgartner L, Handler D, Platzer S, Duchek P, Brennecke J. 2022. The *Drosophila* ZAD zinc  
562 finger protein Kipferl guides Rhino to piRNA clusters. *biorxiv*.
- 563 Belloni M, Tritto P, Bozzetti MP, Palumbo G, Robbins LG. 2002. Does Stellate cause meiotic  
564 drive in *Drosophila melanogaster*? *Genetics* **161**: 1551-1559.
- 565 Blumenstiel JP, Hartl DL. 2005. Evidence for maternally transmitted small interfering RNA in  
566 the repression of transposition in *Drosophila virilis*. *Proc Natl Acad Sci U S A* **102**:  
567 15965-15970.
- 568 Bozzetti MP, Massari S, Finelli P, Meggio F, Pinna LA, Boldyreff B, Issinger OG, Palumbo G,  
569 Ciriaco C, Bonaccorsi S et al. 1995. The Ste locus, a component of the parasitic cry-Ste  
570 system of *Drosophila melanogaster*, encodes a protein that forms crystals in primary  
571 spermatocytes and mimics properties of the beta subunit of casein kinase 2. *Proc Natl*  
572 *Acad Sci U S A* **92**: 6067-6071.
- 573 Brennecke J, Aravin AA, Stark A, Dus M, Kellis M, Sachidanandam R, Hannon GJ. 2007.  
574 Discrete small RNA-generating loci as master regulators of transposon activity in  
575 *Drosophila*. *Cell* **128**: 1089-1103.
- 576 Brennecke J, Malone CD, Aravin AA, Sachidanandam R, Stark A, Hannon GJ. 2008. An  
577 epigenetic role for maternally inherited piRNAs in transposon silencing. *Science* **322**:  
578 1387-1392.
- 579 Chen P, Kotov AA, Godneeva BK, Bazylev SS, Olenina LV, Aravin AA. 2021a. piRNA-  
580 mediated gene regulation and adaptation to sex-specific transposon expression in *D.*  
581 *melanogaster* male germline. *Genes Dev*.
- 582 Chen P, Luo Y, Aravin AA. 2021b. RDC complex executes a dynamic piRNA program during  
583 *Drosophila* spermatogenesis to safeguard male fertility. *PLoS genetics* **17**: e1009591.
- 584 Chen YA, Stuwe E, Luo Y, Ninova M, Le Thomas A, Rozhavskaya E, Li S, Vempati S, Laver  
585 JD, Patel DJ et al. 2016. Cutoff Suppresses RNA Polymerase II Termination to Ensure  
586 Expression of piRNA Precursors. *Mol Cell* **63**: 97-109.
- 587 Choi H, Wang Z, Dean J. 2021. Sperm acrosome overgrowth and infertility in mice lacking  
588 chromosome 18 pachytene piRNA. *PLoS genetics* **17**: e1009485.



- 589 Chou MT, Han BW, Hsiao CP, Zamore PD, Weng Z, Hung JH. 2015. Tailor: a computational  
590 framework for detecting non-templated tailing of small silencing RNAs. *Nucleic Acids*  
591 *Res* **43**: e109.
- 592 Das PP, Bagijn MP, Goldstein LD, Woolford JR, Lehrbach NJ, Sapetschnig A, Buhecha HR,  
593 Gilchrist MJ, Howe KL, Stark R et al. 2008. Piwi and piRNAs act upstream of an  
594 endogenous siRNA pathway to suppress Tc3 transposon mobility in the *Caenorhabditis*  
595 *elegans* germline. *Mol Cell* **31**: 79-90.
- 596 de Albuquerque BF, Placentino M, Ketting RF. 2015. Maternal piRNAs Are Essential for  
597 Germline Development following De Novo Establishment of Endo-siRNAs in  
598 *Caenorhabditis elegans*. *Dev Cell* **34**: 448-456.
- 599 de Vanssay A, Bouge AL, Boivin A, Hermant C, Teyssset L, Delmarre V, Antoniewski C,  
600 Ronsseray S. 2012. Paramutation in *Drosophila* linked to emergence of a piRNA-  
601 producing locus. *Nature* **490**: 112-115.
- 602 Fingerhut JM, Moran JV, Yamashita YM. 2019. Satellite DNA-containing gigantic introns in a  
603 unique gene expression program during *Drosophila* spermatogenesis. *PLoS genetics* **15**:  
604 e1008028.
- 605 Fu Y, Wu PH, Beane T, Zamore PD, Weng Z. 2018. Elimination of PCR duplicates in RNA-seq  
606 and small RNA-seq using unique molecular identifiers. *BMC Genomics* **19**: 531.
- 607 Gainetdinov I, Colpan C, Arif A, Cecchini K, Zamore PD. 2018. A Single Mechanism of  
608 Biogenesis, Initiated and Directed by PIWI Proteins, Explains piRNA Production in Most  
609 Animals. *Mol Cell* **71**: 775-790 e775.
- 610 Gainetdinov I, Colpan C, Cecchini K, Arif A, Jouravleva K, Albosta P, Vega-Badillo J, Lee Y,  
611 Ozata DM, Zamore PD. 2021. Terminal modification, sequence, length, and PIWI-  
612 protein identity determine piRNA stability. *Mol Cell* **81**: 4826-4842 e4828.
- 613 Ge DT, Wang W, Tipping C, Gainetdinov I, Weng Z, Zamore PD. 2019. The RNA-Binding  
614 ATPase, Armitage, Couples piRNA Amplification in Nuage to Phased piRNA Production  
615 on Mitochondria. *Mol Cell* **74**: 982-995 e986.
- 616 Girard A, Sachidanandam R, Hannon GJ, Carmell MA. 2006. A germline-specific class of small  
617 RNAs binds mammalian Piwi proteins. *Nature* **442**: 199-202.
- 618 Glockner FO, Yilmaz P, Quast C, Gerken J, Beccati A, Ciuprina A, Bruns G, Yarza P, Peplies J,  
619 Westram R et al. 2017. 25 years of serving the community with ribosomal RNA gene  
620 reference databases and tools. *J Biotechnol* **261**: 169-176.
- 621 Grivna ST, Beyret E, Wang Z, Lin H. 2006. A novel class of small RNAs in mouse  
622 spermatogenic cells. *Genes Dev* **20**: 1709-1714.
- 623 Gunawardane LS, Saito K, Nishida KM, Miyoshi K, Kawamura Y, Nagami T, Siomi H, Siomi  
624 MC. 2007. A slicer-mediated mechanism for repeat-associated siRNA 5' end formation in  
625 *Drosophila*. *Science* **315**: 1587-1590.
- 626 Han BW, Wang W, Li C, Weng Z, Zamore PD. 2015. Noncoding RNA. piRNA-guided  
627 transposon cleavage initiates Zucchini-dependent, phased piRNA production. *Science*  
628 **348**: 817-821.
- 629 Hardy RW, Lindsley DL, Livak KJ, Lewis B, Siversten AL, Joslyn GL, Edwards J, Bonaccorsi  
630 S. 1984. Cytogenetic analysis of a segment of the Y chromosome of *Drosophila*  
631 *melanogaster*. *Genetics* **107**: 591-610.
- 632 Homolka D, Pandey RR, Goriaux C, Brasset E, Vaury C, Sachidanandam R, Fauvarque MO,  
633 Pillai RS. 2015. PIWI Slicing and RNA Elements in Precursors Instruct Directional  
634 Primary piRNA Biogenesis. *Cell Rep* **12**: 418-428.

- 635 Huang H, Li Y, Szulwach KE, Zhang G, Jin P, Chen D. 2014. AGO3 Slicer activity regulates  
636 mitochondria-nuage localization of Armitage and piRNA amplification. *J Cell Biol* **206**:  
637 217-230.
- 638 Hur JK, Luo Y, Moon S, Ninova M, Marinov GK, Chung YD, Aravin AA. 2016. Splicing-  
639 independent loading of TREX on nascent RNA is required for efficient expression of  
640 dual-strand piRNA clusters in *Drosophila*. *Genes Dev* **30**: 840-855.
- 641 Kalmykova AI, Dobritsa AA, Gvozdev VA. 1998. Su(Ste) diverged tandem repeats in a Y  
642 chromosome of *Drosophila melanogaster* are transcribed and variously processed.  
643 *Genetics* **148**: 243-249.
- 644 Khurana Jaspreet S, Wang J, Xu J, Koppetsch Birgit S, Thomson Travis C, Nowosielska A, Li C,  
645 Zamore Phillip D, Weng Z, Theurkauf William E. 2011. Adaptation to *P*  
646 Element Transposon Invasion in *Drosophila melanogaster*. *Cell* **147**: 1551-  
647 1563.
- 648 Kidwell MG, Kidwell JF. 1976. Selection for male recombination in *Drosophila melanogaster*.  
649 *Genetics* **84**: 333-351.
- 650 Kidwell MG, Kidwell JF, Nei M. 1973. A case of high rate of spontaneous mutation affecting  
651 viability in *Drosophila melanogaster*. *Genetics* **75**: 133-153.
- 652 Kidwell MG, Kidwell JF, Sved JA. 1977. Hybrid Dysgenesis in DROSOPHILA  
653 MELANOGASTER: A Syndrome of Aberrant Traits Including Mutation, Sterility and  
654 Male Recombination. *Genetics* **86**: 813-833.
- 655 Klattenhoff C, Xi H, Li C, Lee S, Xu J, Khurana JS, Zhang F, Schultz N, Koppetsch BS,  
656 Nowosielska A et al. 2009. The *Drosophila* HP1 homolog Rhino is required for  
657 transposon silencing and piRNA production by dual-strand clusters. *Cell* **138**: 1137-1149.
- 658 Lau NC, Seto AG, Kim J, Kuramochi-Miyagawa S, Nakano T, Bartel DP, Kingston RE. 2006.  
659 Characterization of the piRNA complex from rat testes. *Science* **313**: 363-367.
- 660 Le Thomas A, Stuwe E, Li S, Du J, Marinov G, Rozhkov N, Chen YC, Luo Y, Sachidanandam  
661 R, Toth KF et al. 2014. Transgenerationally inherited piRNAs trigger piRNA biogenesis  
662 by changing the chromatin of piRNA clusters and inducing precursor processing. *Genes*  
663 *Dev* **28**: 1667-1680.
- 664 Livak KJ. 1984. Organization and mapping of a sequence on the *Drosophila melanogaster* X and  
665 Y chromosomes that is transcribed during spermatogenesis. *Genetics* **107**: 611-634.
- 666 McKee BD, Satter MT. 1996. Structure of the Y chromosomal Su(Ste) locus in *Drosophila*  
667 *melanogaster* and evidence for localized recombination among repeats. *Genetics* **142**:  
668 149-161.
- 669 Mohn F, Handler D, Brennecke J. 2015. Noncoding RNA. piRNA-guided slicing specifies  
670 transcripts for Zucchini-dependent, phased piRNA biogenesis. *Science* **348**: 812-817.
- 671 Mohn F, Sienski G, Handler D, Brennecke J. 2014. The rhino-deadlock-cutoff complex licenses  
672 noncanonical transcription of dual-strand piRNA clusters in *Drosophila*. *Cell* **157**: 1364-  
673 1379.
- 674 Moon S, Cassani M, Lin YA, Wang L, Dou K, Zhang ZZZ. 2018. A Robust Transposon-  
675 Endogenizing Response from Germline Stem Cells. *Developmental Cell* **47**: 660-  
676 671.e663.
- 677 Munafo M, Manelli V, Falconio FA, Sawle A, Kneuss E, Eastwood EL, Seah JWE, Czech B,  
678 Hannon GJ. 2019. Daedalus and Gasz recruit Armitage to mitochondria, bringing piRNA  
679 precursors to the biogenesis machinery. *Genes Dev* **33**: 844-856.



- 680 Nagao A, Mituyama T, Huang H, Chen D, Siomi MC, Siomi H. 2010. Biogenesis pathways of  
681 piRNAs loaded onto AGO3 in the *Drosophila* testis. *RNA*.
- 682 Nishida KM, Saito K, Mori T, Kawamura Y, Nagami-Okada T, Inagaki S, Siomi H, Siomi MC.  
683 2007. Gene silencing mechanisms mediated by Aubergine piRNA complexes in  
684 *Drosophila* male gonad. *RNA* **13**: 1911-1922.
- 685 Ozata DM, Gainetdinov I, Zoch A, O'Carroll D, Zamore PD. 2019. PIWI-interacting RNAs:  
686 small RNAs with big functions. *Nat Rev Genet* **20**: 89-108.
- 687 Pal-Bhadra M, Leibovitch BA, Gandhi SG, Chikka MR, Bhadra U, Birchler JA, Elgin SC. 2004.  
688 Heterochromatic silencing and HP1 localization in *Drosophila* are dependent on the  
689 RNAi machinery. *Science* **303**: 669-672.
- 690 Pane A, Jiang P, Zhao DY, Singh M, Schupbach T. 2011. The Cutoff protein regulates piRNA  
691 cluster expression and piRNA production in the *Drosophila* germline. *EMBO J* **30**: 4601-  
692 4615.
- 693 Pane A, Wehr K, Schupbach T. 2007. zucchini and squash encode two putative nucleases  
694 required for rasiRNA production in the *Drosophila* germline. *Dev Cell* **12**: 851-862.
- 695 Post C, Clark JP, Sytnikova YA, Chirn GW, Lau NC. 2014. The capacity of target silencing by  
696 *Drosophila* PIWI and piRNAs. *RNA* **20**: 1977-1986.
- 697 Quenerch' du E, Anand A, Kai T. 2016. The piRNA pathway is developmentally regulated during  
698 spermatogenesis in *Drosophila*. *RNA* **22**: 1044-1054.
- 699 Raj A, Tyagi S. 2010. Detection of individual endogenous RNA transcripts in situ using multiple  
700 singly labeled probes. *Methods Enzymol* **472**: 365-386.
- 701 Ronsseray S, Anxolabehere D, Periquet G. 1984. Hybrid dysgenesis in *Drosophila melanogaster*:  
702 influence of temperature on cytotypic determination in the P-M system. *Mol Gen Genet*  
703 **196**: 17-23.
- 704 Saito K, Nishida KM, Mori T, Kawamura Y, Miyoshi K, Nagami T, Siomi H, Siomi MC. 2006.  
705 Specific association of Piwi with rasiRNAs derived from retrotransposon and  
706 heterochromatic regions in the *Drosophila* genome. *Genes Dev* **20**: 2214-2222.
- 707 Senti KA, Jurczak D, Sachidanandam R, Brennecke J. 2015. piRNA-guided slicing of transposon  
708 transcripts enforces their transcriptional silencing via specifying the nuclear piRNA  
709 repertoire. *Genes Dev* **29**: 1747-1762.
- 710 Sienski G, Donertas D, Brennecke J. 2012. Transcriptional silencing of transposons by Piwi and  
711 maelstrom and its impact on chromatin state and gene expression. *Cell* **151**: 964-980.
- 712 Srivastav SP, Rahman R, Ma Q, Pierre J, Bandyopadhyay S, Lau NC. 2019. Har-P, a short P-  
713 element variant, weaponizes P-transposase to severely impair *Drosophila* development.  
714 *Elife* **8**.
- 715 Teixeira FK, Okuniewska M, Malone CD, Coux RX, Rio DC, Lehmann R. 2017. piRNA-  
716 mediated regulation of transposon alternative splicing in the soma and germ line. *Nature*.
- 717 Vagin VV, Sigova A, Li C, Seitz H, Gvozdev V, Zamore PD. 2006. A distinct small RNA  
718 pathway silences selfish genetic elements in the germline. *Science* **313**: 320-324.
- 719 Van Doren M, Williamson AL, Lehmann R. 1998. Regulation of zygotic gene expression in  
720 *Drosophila* primordial germ cells. *Curr Biol* **8**: 243-246.
- 721 Wakisaka KT, Ichiyangi K, Ohno S, Itoh M. 2017. Diversity of P-element piRNA production  
722 among M' and Q strains and its association with P-M hybrid dysgenesis in *Drosophila*  
723 *melanogaster*. *Mobile DNA* **8**: 13.

- 724 Wang W, Han BW, Tipping C, Ge DT, Zhang Z, Weng Z, Zamore PD. 2015. Slicing and  
725 Binding by Ago3 or Aub Trigger Piwi-Bound piRNA Production by Distinct  
726 Mechanisms. *Mol Cell* **59**: 819-830.
- 727 Wang W, Yoshikawa M, Han Bo W, Izumi N, Tomari Y, Weng Z, Zamore Phillip D. 2014. The  
728 Initial Uridine of Primary piRNAs Does Not Create the Tenth Adenine that Is the  
729 Hallmark of Secondary piRNAs. *Molecular Cell* **56**: 708-716.
- 730 Wu PH, Fu Y, Cecchini K, Ozata DM, Arif A, Yu T, Colpan C, Gainetdinov I, Weng Z, Zamore  
731 PD. 2020. The evolutionarily conserved piRNA-producing locus pi6 is required for male  
732 mouse fertility. *Nat Genet* **52**: 728-739.
- 733 Yamashiro H, Negishi M, Kinoshita T, Ishizu H, Ohtani H, Siomi MC. 2020. Armitage  
734 determines Piwi-piRISC processing from precursor formation and quality control to inter-  
735 organelle translocation. *EMBO Rep* **21**: e48769.
- 736 Yang Z, Chen KM, Pandey RR, Homolka D, Reuter M, Janeiro BK, Sachidanandam R,  
737 Fauvarque MO, McCarthy AA, Pillai RS. 2016. PIWI Slicing and EXD1 Drive  
738 Biogenesis of Nuclear piRNAs from Cytosolic Targets of the Mouse piRNA Pathway.  
739 *Mol Cell* **61**: 138-152.
- 740 Zhang Z, Wang J, Schultz N, Zhang F, Parhad SS, Tu S, Vreven T, Zamore PD, Weng Z,  
741 Theurkauf WE. 2014. The HP1 homolog rhino anchors a nuclear complex that suppresses  
742 piRNA precursor splicing. *Cell* **157**: 1353-1363.

743
